# Supplementary material for: IL-17A is produced by breast cancer TILs and promotes chemoresistance and proliferation through ERK1/2
Source: PubMed Central journal article supplement — Sci Rep. 2013 Dec 9;3:3456. doi: 10.1038/srep03456 (PMC3856404; doi:10.1038/srep03456), 2013-12-09
Supplement: srep03456-s1.pdf [file srep03456-s1.pdf]

**IL-17A is produced by breast cancer TILs and promotes chemoresistance and proliferation through ERK1/2**

Stéphanie Cochaud, Jérôme Giustiniani, Clémence Thomas, Emilie Laprevotte, Christian Garbar, Aude-Marie Savoye, Hervé Curé, Corinne Mascaux, Gilles Alberici, Nathalie Bonnefoy, Jean-François Eliaou, Armand Bensussan, Jeremy Bastid

**SUPPLEMENTAL INFORMATION**

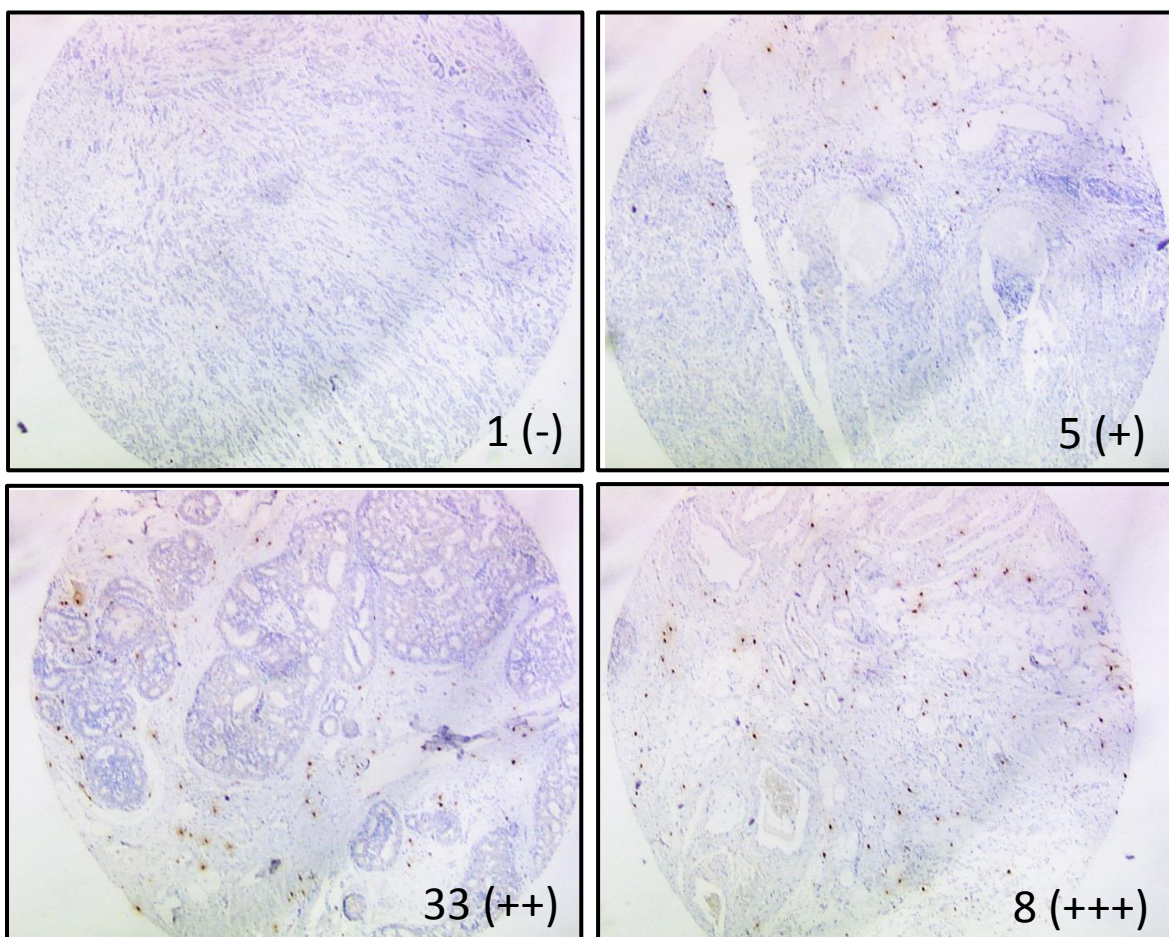

**Supplementary Figure 1: Scoring used in breast tissue array.** Cancer cases were scored negative (-), weak (+), moderate (++) and strong (+++) depending of the number of the positive cells within the stroma as illustrated (Magnification x20).

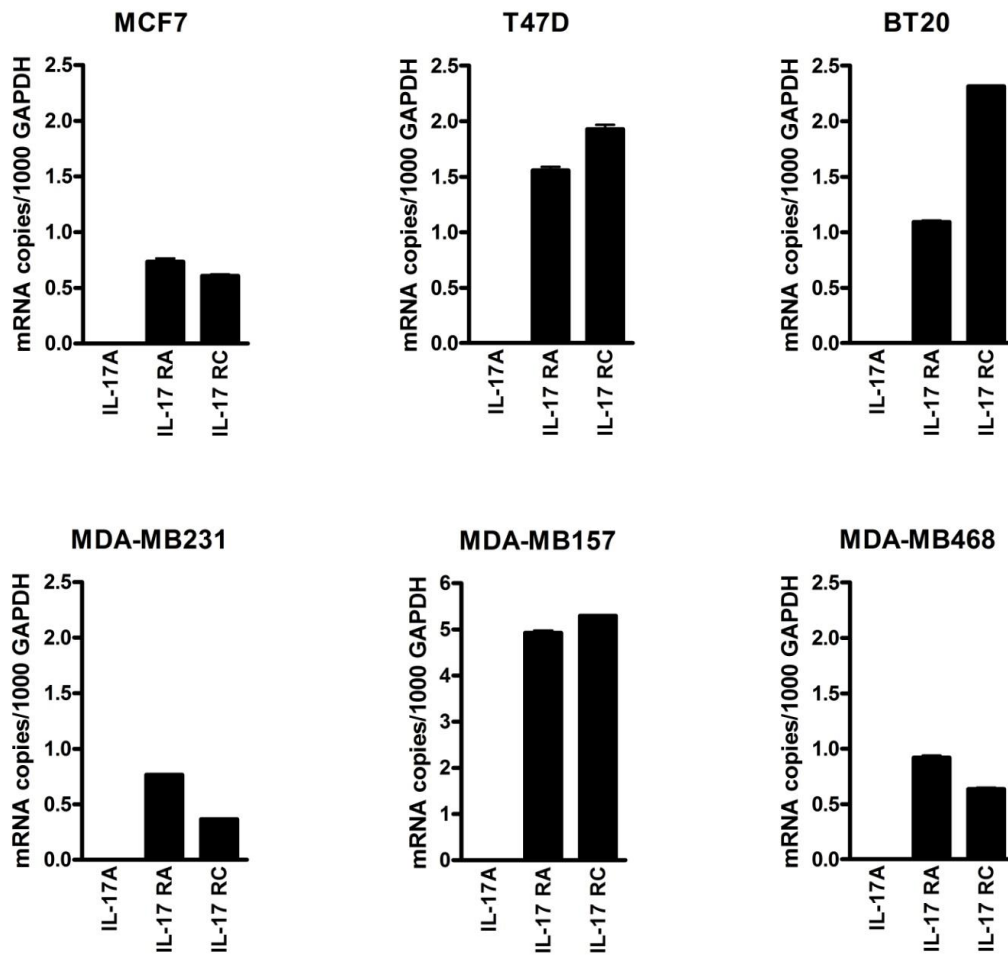

**Supplementary Figure 2: Expression of IL17A, IL17RA and IL17RC in human cancer cell lines.**

Expression of IL17A, IL17RA and IL17RC were analyzed by quantitative RT-PCR.

|               | ID (match) | Diagnosis                   | pTNM    | Stage | Histological grade | ER | PR | Her2 | Last follow up | IL-17A |
|---------------|------------|-----------------------------|---------|-------|--------------------|----|----|------|----------------|--------|
| Primary tumor | 1          | infiltrating duct carcinoma | T2N0M0  | IIA   | II                 | +  | +  | -    | alive          | -      |
|               | 2          | infiltrating duct carcinoma | T2N0M0  | IIA   | II                 | -  | +  | -    | alive          | -      |
|               | 3          | infiltrating duct carcinoma | T2N2aM0 | IIIA  | II                 | -  | +  | -    | alive          | ++     |
|               | 4          | infiltrating duct carcinoma | T2N2aM0 | IIIA  | III                | +  | -  | +    | dead           | -      |
|               | 5          | infiltrating duct carcinoma | T2N0M0  | IIA   | III                | -  | -  | -    | alive          | ++     |
|               | 6          | infiltrating duct carcinoma | T2N0M0  | IIA   | II                 | +  | -  | -    | alive          | -      |
|               | 7          | infiltrating duct carcinoma | T3N3aM0 | IIIC  | II                 | +  | -  | -    | dead           | -      |
|               | 8          | infiltrating duct carcinoma | T3N0M0  | IIB   | II                 | -  | -  | -    | alive          | +++    |

|     |         |                                 |          |      |         |   |   |   |       |     |
|-----|---------|---------------------------------|----------|------|---------|---|---|---|-------|-----|
|     | 9       | infiltrating duct carcinoma     | T2N2aM0  | IIIA | III     | - | - | - | alive | -   |
|     | 10      | infiltrating duct carcinoma     | T2N0M0   | IIA  | II      | - | - | - | alive | +   |
|     | 11      | infiltrating duct carcinoma     | T2N0M0   | IIA  | III     | - | - | + | alive | +   |
|     | 12      | infiltrating duct carcinoma     | T2N0M0   | IIA  | III     | + | + | - | alive | -   |
|     | 13      | infiltrating duct carcinoma     | T2N0M0   | IIA  | III     | - | - | - | dead  | -   |
|     | 14      | sarcomatoid carcinoma           | T2N1aM0  | IIB  | III     | - | - | + | alive | +++ |
|     | 15      | infiltrating duct carcinoma     | T3N1aM0  | IIIA | III     | + | - | - | alive | +++ |
|     | 16      | infiltrating duct carcinoma     | T2N1miM0 | IIB  | II      | + | + | - | alive | -   |
|     | 17      | infiltrating duct carcinoma     | T2N1miM0 | IIB  | II      | - | + | - | alive | ++  |
|     | 18      | intraductal papillary carcinoma | T2N0M0   | IIA  | unknown | + | + | - | alive | +   |
|     | 19      | infiltrating duct carcinoma     | T3N0M0   | IIB  | III     | - | - | - | alive | -   |
|     | 20      | atypical medullary carcinoma    | T2N1aM0  | IIB  | unknown | - | - | - | alive | -   |
|     | 21      | infiltrating duct carcinoma     | T2N0M0   | IIA  | III     | + | + | - | alive | -   |
|     | 22      | infiltrating duct carcinoma     | T2N0M0   | IIA  | unknown | - | - | - | alive | -   |
|     | 23      | infiltrating duct carcinoma     | T2N3aM0  | IIIC | II      | + | + | - | alive | -   |
|     | 24      | infiltrating duct carcinoma     | T2N1miM0 | IIB  | II      | - | + | + | alive | -   |
|     | 25      | infiltrating duct carcinoma     | T2N1aM0  | IIB  | III     | - | - | + | alive | -   |
|     | 26      | infiltrating duct carcinoma     | T2N1aM0  | IIB  | III     | + | + | + | alive | -   |
|     | 27      | infiltrating duct carcinoma     | T2N0M0   | IIA  | III     | + | - | - | alive | -   |
|     | 28      | infiltrating duct carcinoma     | T3N1aM0  | IIIA | II      | + | - | - | alive | -   |
|     | 29      | infiltrating duct carcinoma     | T2N1aM0  | IIB  | II      | - | - | - | dead  | -   |
|     | 30      | infiltrating duct carcinoma     | T3N2aM0  | IIIA | II      | - | - | + | dead  | -   |
|     | 31      | infiltrating duct carcinoma     | T2N3aM0  | IIIC | III     | - | - | - | alive | -   |
|     | 32      | infiltrating duct carcinoma     | T2N1aM0  | IIB  | III     | - | - | - | alive | ++  |
|     | 33      | infiltrating duct carcinoma     | T2N3aM0  | IIIC | III     | - | - | - | dead  | ++  |
|     | 34      | infiltrating duct carcinoma     | T2N3aM0  | IIIC | III     | - | - | + | alive | -   |
|     | 35      | infiltrating duct carcinoma     | T2N3aM0  | IIIC | III     | - | - | + | alive | -   |
|     | 36      | infiltrating duct carcinoma     | T2N2aM0  | IIIA | III     | - | - | - | alive | +   |
|     | 37      | infiltrating duct carcinoma     | T2N1aM0  | IIB  | III     | - | - | - | alive | -   |
|     | 38      | infiltrating duct carcinoma     | T2N3aM0  | IIIC | III     | - | - | + | alive | +   |
|     | 39      | infiltrating duct carcinoma     | T3N2aM0  | IIIA | II      | - | - | + | alive | +   |
|     | 40      | infiltrating duct carcinoma     | T3N3aM0  | IIIC | II      | - | - | - | dead  | -   |
| LNM | 41 (31) | metastatic carcinoma            |          |      |         | - | - | - |       | -   |
|     | 42 (32) | metastatic carcinoma            |          |      |         | - | - | - |       | ++  |
|     | 43 (33) | metastatic carcinoma            |          |      |         | - | - | + |       | -   |

|        |         |                      |  |  |  |   |   |   |  |   |
|--------|---------|----------------------|--|--|--|---|---|---|--|---|
|        | 44 (34) | metastatic carcinoma |  |  |  | - | - | + |  | + |
|        | 45 (35) | metastatic carcinoma |  |  |  | - | - | + |  | - |
|        | 46 (36) | metastatic carcinoma |  |  |  | - | - | - |  | - |
|        | 47 (37) | metastatic carcinoma |  |  |  | - | - | - |  | - |
|        | 48 (38) | metastatic carcinoma |  |  |  | - | - | + |  | + |
|        | 49 (39) | metastatic carcinoma |  |  |  | - | - | + |  | - |
|        | 50 (40) | metastatic carcinoma |  |  |  | - | - | - |  | - |
| Normal | 51 (5)  | normal               |  |  |  |   |   |   |  | + |
|        | 52 (31) | normal               |  |  |  |   |   |   |  | + |
|        | 53 (8)  | normal               |  |  |  |   |   |   |  | + |
|        | 54 (10) | normal               |  |  |  |   |   |   |  | + |
|        | 55 (11) | normal               |  |  |  |   |   |   |  | - |
|        | 56 (12) | normal               |  |  |  |   |   |   |  | + |
|        | 57 (13) | normal               |  |  |  |   |   |   |  | + |
|        | 58 (34) | normal               |  |  |  |   |   |   |  | + |
|        | 59 (35) | normal               |  |  |  |   |   |   |  | + |

**Supplementary Table 1: Breast tissue arrays data.** LNM = lymph node metastasis. Numbers in brackets indicate samples from the same patient (e.g., sample #45 is the LNM biopsy from cancer case #35, and sample #59 is the normal breast tissue from the same patient)
